# Supplementary figures and images for: In situ synthesis and properties of Ag/Ag10Si4O13/GO photocatalysts with synergistic effect of plasma Resonance and Schottky junction
Source: Royal Society of Chemistry journal article supplement (doi:10.1039/d2ma00743f), 2022-12-30

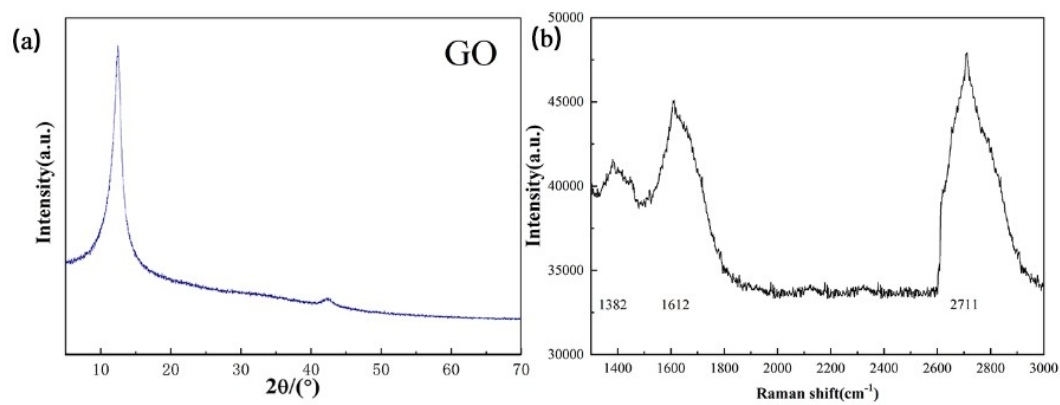

Fig. S1. XRD pattern (a) and Raman spectrum (b) of GO.

Supplement: d2ma00743f1.pdf [file d2ma00743f1.pdf]
